# Supplementary material for: Assessing the impact of early progressive mobilization on moderate-to-severe traumatic brain injury: a randomized controlled trial
Source: PubMed Central journal article supplement (PMC11112875; doi:10.1186/s13054-024-04940-0), 2024-05-22
Supplement: 13054_2024_4940_MOESM1_ESM.pdf [file 13054_2024_4940_MOESM1_ESM.pdf]

# FIM™ instrument

Functional Independence Measure

|               |                                                                                                                                                                                                                                                         |                  |
|---------------|---------------------------------------------------------------------------------------------------------------------------------------------------------------------------------------------------------------------------------------------------------|------------------|
| <b>LEVELS</b> | 7 Complete Independence (Timely, Safely)<br>6 Modified Independence (Device)                                                                                                                                                                            | <b>NO HELPER</b> |
|               | <b>Modified Dependence</b><br>5 Supervision (Subject = 100%+)<br>4 Minimal Assist (Subject = 75%+)<br>3 Moderate Assist (Subject = 50%+)<br><b>Complete Dependence</b><br>2 Maximal Assist (Subject = 25%+)<br>1 Total Assist (Subject = less than 25%) | <b>HELPER</b>    |

|                                 | ADMISSION                                                                  | DISCHARGE                                                                  | FOLLOW-UP                                                                  |
|---------------------------------|----------------------------------------------------------------------------|----------------------------------------------------------------------------|----------------------------------------------------------------------------|
| <b>Self-Care</b>                |                                                                            |                                                                            |                                                                            |
| A. Eating                       | <input type="text"/>                                                       | <input type="text"/>                                                       | <input type="text"/>                                                       |
| B. Grooming                     | <input type="text"/>                                                       | <input type="text"/>                                                       | <input type="text"/>                                                       |
| C. Bathing                      | <input type="text"/>                                                       | <input type="text"/>                                                       | <input type="text"/>                                                       |
| D. Dressing - Upper Body        | <input type="text"/>                                                       | <input type="text"/>                                                       | <input type="text"/>                                                       |
| E. Dressing - Lower Body        | <input type="text"/>                                                       | <input type="text"/>                                                       | <input type="text"/>                                                       |
| F. Toileting                    | <input type="text"/>                                                       | <input type="text"/>                                                       | <input type="text"/>                                                       |
| <b>Sphincter Control</b>        |                                                                            |                                                                            |                                                                            |
| G. Bladder Management           | <input type="text"/>                                                       | <input type="text"/>                                                       | <input type="text"/>                                                       |
| H. Bowel Management             | <input type="text"/>                                                       | <input type="text"/>                                                       | <input type="text"/>                                                       |
| <b>Transfers</b>                |                                                                            |                                                                            |                                                                            |
| I. Bed, Chair, Wheelchair       | <input type="text"/>                                                       | <input type="text"/>                                                       | <input type="text"/>                                                       |
| J. Toilet                       | <input type="text"/>                                                       | <input type="text"/>                                                       | <input type="text"/>                                                       |
| K. Tub, Shower                  | <input type="text"/>                                                       | <input type="text"/>                                                       | <input type="text"/>                                                       |
| <b>Locomotion</b>               |                                                                            |                                                                            |                                                                            |
| L. Walk/Wheelchair              | <input type="text"/> <input type="text"/> W Walk<br>C Wheelchair<br>B Both | <input type="text"/> <input type="text"/> W Walk<br>C Wheelchair<br>B Both | <input type="text"/> <input type="text"/> W Walk<br>C Wheelchair<br>B Both |
| M. Stairs                       | <input type="text"/>                                                       | <input type="text"/>                                                       | <input type="text"/>                                                       |
| <b>Motor Subtotal Score</b>     | <input type="text"/>                                                       | <input type="text"/>                                                       | <input type="text"/>                                                       |
| <b>Communication</b>            |                                                                            |                                                                            |                                                                            |
| N. Comprehension                | <input type="text"/> <input type="text"/> A Auditory<br>V Visual<br>B Both | <input type="text"/> <input type="text"/> A Auditory<br>V Visual<br>B Both | <input type="text"/> <input type="text"/> A Auditory<br>V Visual<br>B Both |
| O. Expression                   | <input type="text"/> <input type="text"/> V Vocal<br>N Nonvocal<br>B Both  | <input type="text"/> <input type="text"/> V Vocal<br>N Nonvocal<br>B Both  | <input type="text"/> <input type="text"/> V Vocal<br>N Nonvocal<br>B Both  |
| <b>Social Cognition</b>         |                                                                            |                                                                            |                                                                            |
| P. Social Interaction           | <input type="text"/>                                                       | <input type="text"/>                                                       | <input type="text"/>                                                       |
| Q. Problem Solving              | <input type="text"/>                                                       | <input type="text"/>                                                       | <input type="text"/>                                                       |
| R. Memory                       | <input type="text"/>                                                       | <input type="text"/>                                                       | <input type="text"/>                                                       |
| <b>Cognitive Subtotal Score</b> | <input type="text"/>                                                       | <input type="text"/>                                                       | <input type="text"/>                                                       |
| <b>TOTAL FIM Score</b>          | <input type="text"/>                                                       | <input type="text"/>                                                       | <input type="text"/>                                                       |

**NOTE:** Leave no blanks; enter 1 if patient not testable due to risk  
 Copyright © 1993 Uniform Data System for Medical Rehabilitation, a division of U B Foundation Activities, Inc

Functional Independence Measure. Copyright © 1996. Uniform Data System for Medical Rehabilitation.  
 All rights reserved. Reprinted with permission of UDSMR, University at Buffalo, 232 Parker Hall, 3435 Main Street, Buffalo, NY 14214.
